# Supplementary material
Source: Springer Nature journal article supplement (https://www.springermedizin.de/resource/supplementary/12885_2014_5102_MOESM2_ESM.pdf/9468368)

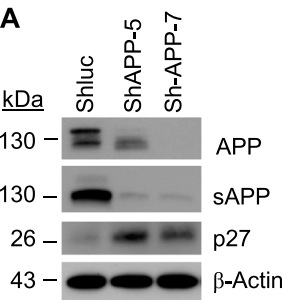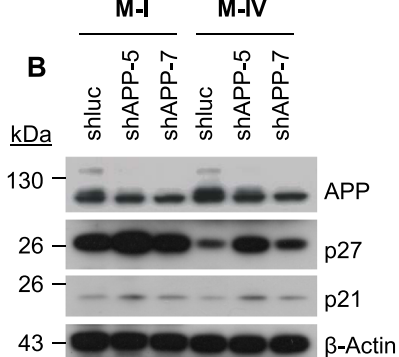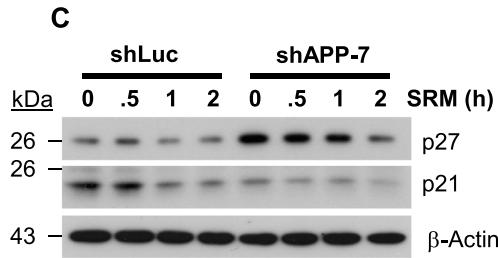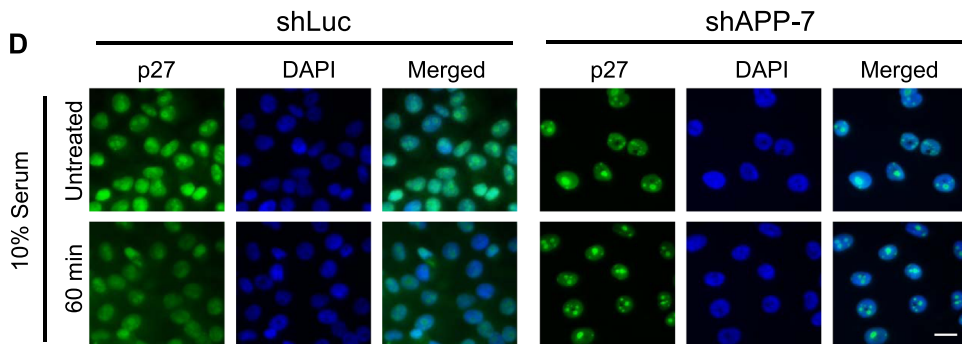

Supplement: MOESM2 [file 9468368]
